# Supplementary material for: Climate Change and Future Pollen Allergy in Europe
Source: PubMed Central journal article supplement (PMC5332176; doi:10.1289/ehp173), 2016-08-24
Supplement: EHP173.s001.acco.pdf [file EHP173.s001.acco.pdf]

**Note to readers with disabilities:** *EHP* strives to ensure that all journal content is accessible to all readers. However, some figures and Supplemental Material published in *EHP* articles may not conform to [508 standards](#) due to the complexity of the information being presented. If you need assistance accessing journal content, please contact [ehp508@niehs.nih.gov](mailto:ehp508@niehs.nih.gov). Our staff will work with you to assess and meet your accessibility needs within 3 working days.

## **Supplemental Material**

### **Climate Change and Future Pollen Allergy in Europe**

Iain R. Lake, Natalia R. Jones, Maureen Agnew, Clare M. Goodess, Filippo Giorgi, Lynda Hamaoui-Laguel, Mikhail A. Semenov, Fabien Solomon, Jonathan Storkey, Robert Vautard, and  
Michelle M. Epstein

#### **Table of Contents**

**Figure S1:** Process for selecting studies reporting sensitization to ragweed pollen

**Table S1:** Ragweed Sensitization Rate (RSR) exclusion criteria

**Table S2:** Ragweed sensitization rates included in the review and summary information collected

#### **References**

**Figure S2:** Baseline and future population (percentage) sensitized to ragweed pollen at the NUTS2 level for RCP4.5 and RCP8.5 and a reference plant invasion scenario. Data are presented separately for the CHIMERE and WRF/RegCM model suites.

**Table S3:** Population (in thousands) sensitized to ragweed for the current and future. Reference ragweed invasion scenario comparing RCP 4.5 and RCP 8.5, and 2 climate model suites (Chimere, WRF/RegCM) for 40 European countries; 95% confidence interval (CIs) shown in brackets.

**Table S4:** Current and future populations clinically sensitized to ragweed pollen. Changes due to population change are also presented. Data are average of the CHIMERE and WRF/RegCM model suites for RCP4.5 and a reference plant invasion scenario.

**Figure S1: Process for selecting studies reporting sensitization to ragweed pollen**

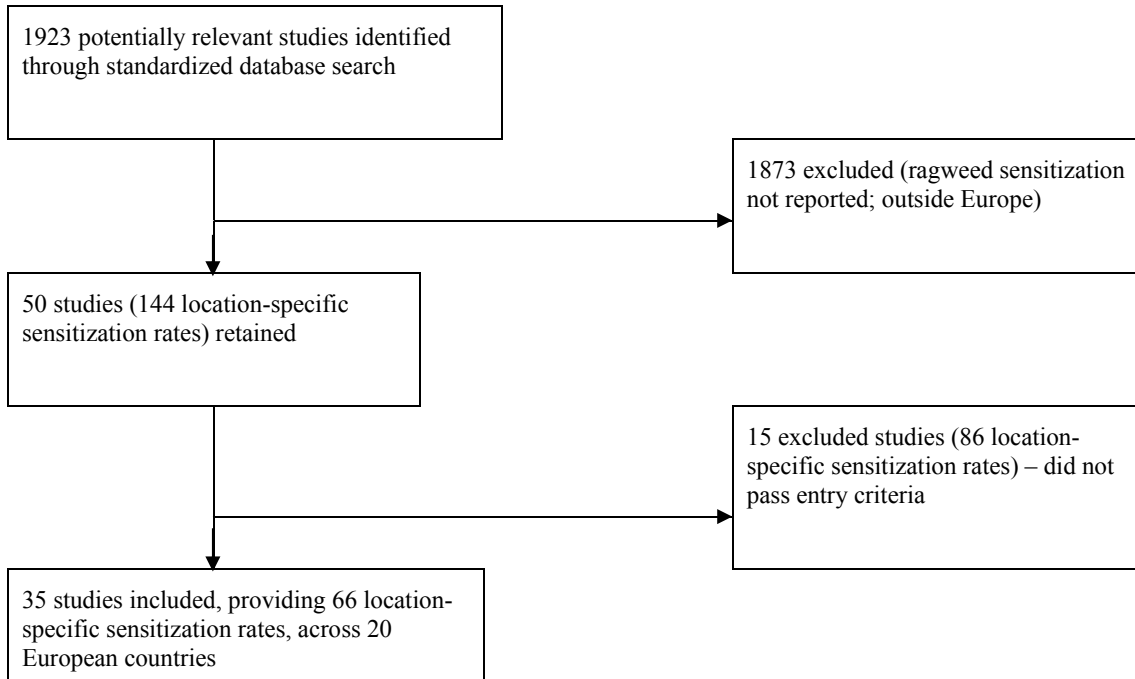

**Table S1: Ragweed Sensitization Rate (RSR) exclusion criteria**

|                                                                                                                                                                                                                                               |
|-----------------------------------------------------------------------------------------------------------------------------------------------------------------------------------------------------------------------------------------------|
| <b>First filter:</b>                                                                                                                                                                                                                          |
| Ragweed sensitization is not reported in the study                                                                                                                                                                                            |
| The study has taken place outside Europe                                                                                                                                                                                                      |
|                                                                                                                                                                                                                                               |
| <b>Second filter exclusion criteria:</b>                                                                                                                                                                                                      |
| RSR is not clearly restricted to ragweed pollen alone but e.g., for ragweed and/or mug wort                                                                                                                                                   |
| RSR is reported for an unrepresentative or overly-focused sub group of the population (e.g. an elderly cohort living in an institution, weed-sensitive allergy patients, allergy patients only symptomatic during ragweed season, immigrants) |
| The sample size is < 50 individuals                                                                                                                                                                                                           |
| The date of the study is pre 1993 (i.e., over 20 years before the start of the present project)                                                                                                                                               |
|                                                                                                                                                                                                                                               |

**Table S2: Ragweed sensitization rates included in the review and summary information collected**

| Citation                  | Year(s) of data collection | Location of data collection: country, place name | Study size     | Population characteristics (including age, allergy/atopic patients or general population) | Sensitization rate (%) | Reactivity marker <sup>‡</sup> |
|---------------------------|----------------------------|--------------------------------------------------|----------------|-------------------------------------------------------------------------------------------|------------------------|--------------------------------|
| (Hemmer et al. 2011)      | 1997-2007                  | Austria, all regions                             | 13719          | Atopic patients diagnosed between 1997 and 2007                                           | 11.1                   | SPT                            |
| (Hemmer et al. 2011)      | 1997-2007                  | Austria, Alpine regions                          | 13719          | Atopic patients diagnosed between 1997 and 2007                                           | 5.4 (4.7-6.0)          | SPT                            |
| (Hemmer et al. 2011)      | 1997-2007                  | Austria, Eastern lowlands adjoining Hungary      | 13719          | Atopic patients diagnosed between 1997 and 2007                                           | 20.8                   | SPT                            |
| (Heinzerling et al. 2009) | 2006–2007                  | Austria, Vienna                                  | not given*     | Standardized allergy patients (GA <sup>2</sup> LEN)                                       | 8.5                    | SPT                            |
| (Jäger 2000)              | 1984-1997                  | Austria, Vienna                                  | 3510 (1993-97) | Allergy outpatients restricted to the period 1993-1997.                                   | 30.6                   | SPT + sp IGE                   |
| (Heinzerling et al. 2009) | 2006–2007                  | Belgium, Ghent                                   | not given*     | Standardized allergy patients (GA <sup>2</sup> LEN)                                       | 3.0                    | SPT                            |
| (Nikolov et al. 2013)     | 2011-2012                  | Bulgaria, Sofia                                  | 74             | 74 patients sensitized to grass and/or weed pollen                                        | 21.6                   | SPT                            |
| (Toth et al. 2011)        | 2003-2006                  | Croatia, Ivanic Grad                             | 614            | Patients referred to respiratory hospital for the first time for skin prick tests         | 51.1                   | SPT                            |
| (ATOPICA 2014)            | 2012-2014                  | Croatia, Ivanic Grad                             | 157            | Children (aged 2-13y), general population                                                 | 19.1                   | SPT (≥ 2 mm)                   |
| (ATOPICA 2014)            | 2012-2014                  | Croatia, Osijek                                  | 582            | Children (aged 2-13y), general population                                                 | 17.5                   | SPT (≥ 2 mm)                   |
| (Toth et al. 2011)        | 2003-2006                  | Croatia, Samobor                                 | 493            | Patients referred to respiratory hospital for the first time for skin prick tests         | 15.6                   | SPT                            |
| (ATOPICA 2014)            | 2012-2014                  | Croatia, Samobor                                 | 169            | Children (aged 2-13y), general population                                                 | 16.6                   | SPT (≥ 2 mm)                   |
| (ATOPICA 2014)            | 2012-2014                  | Croatia, Slavonski Brod                          | 540            | Children (aged 2-13y), general population                                                 | 15.2                   | SPT (≥ 2 mm)                   |
| (ATOPICA 2014)            | 2012-2014                  | Croatia, Split                                   | 1180           | Children (aged 2-13y), general population                                                 | 1.9                    | SPT (≥ 2 mm)                   |
| (Cvitanovic et al. 2007)  | 2003                       | Croatia, Split-Dalmatia                          | 320            | 320 patients from Split-Dalmatian County with seasonal rhinitis and                       | 17.5                   | SPT                            |

| Citation                               | Year(s) of data collection      | Location of data collection: country, place name | Study size           | Population characteristics (including age, allergy/atopic patients or general population)                         | Sensitization rate (%) | Reactivity marker <sup>‡</sup> |
|----------------------------------------|---------------------------------|--------------------------------------------------|----------------------|-------------------------------------------------------------------------------------------------------------------|------------------------|--------------------------------|
|                                        |                                 |                                                  |                      | asthma symptoms                                                                                                   |                        |                                |
| (ATOPICA 2014)                         | 2012-2014                       | Croatia, Velika Gorica                           | 182                  | Children (aged 2-13y), general population                                                                         | 16.5                   | SPT (≥ 2 mm)                   |
| (ATOPICA 2014)                         | 2012-2014                       | Croatia, Zadar                                   | 390                  | Children (aged 2-13y), general population                                                                         | 2.1                    | SPT (≥ 2 mm)                   |
| (ATOPICA 2014)                         | 2012-2014                       | Croatia, Zagreb                                  | 816                  | Children (aged 2-13y), general population                                                                         | 14.8                   | SPT (≥ 2 mm)                   |
| (Toth et al. 2011)                     | 2003-2006                       | Croatia, Zagreb                                  | 1085                 | Patients referred to respiratory hospital for the first time for skin prick tests. Mean of north and south Zagreb | 34.5                   | SPT                            |
| (Peternel et al. 2008)                 | 2004                            | Croatia, Zagreb city                             | 750                  | Adult patients presenting for first time at respiratory clinic (aged 18-80y)                                      | 48.7                   | SPT                            |
| (Mehulić et al. 2011)                  | 1991-1994; 1995-1999, 2000-2004 | Croatia; Zagreb and surrounding areas            | 2577 (794, 814, 969) | Outpatient allergy clinic. Mean of three time periods                                                             | 31.9                   | SPT / sp IGE                   |
| (Rybniček et al. 2000)                 | 1995                            | Czech Republic, Brno                             | 94                   | Children with pollen allergy (symptomatic)                                                                        | 22.0                   | SPT + sp IgE                   |
| (Rybniček et al. 2000)                 | 1995-1997                       | Czech Republic, Brno                             | 645                  | Adult allergic patients suggestive of pollen allergy                                                              | 22.9                   | SPT + sp IgE                   |
| (Heinzerling et al. 2009) <sup>a</sup> | 2006–2007                       | Denmark, Odense                                  | not given*           | Standardized allergy patients (GA <sup>2</sup> LEN)                                                               | 17.1                   | SPT                            |
| (Heinzerling et al. 2009) <sup>a</sup> | 2006–2007                       | Finland, Helsinki                                | not given*           | Standardized allergy patients (GA <sup>2</sup> LEN)                                                               | 2.3                    | SPT                            |
| (Heinzerling et al. 2009)              | 2006–2007                       | France, Montpellier                              | not given*           | Standardized allergy patients (GA <sup>2</sup> LEN)                                                               | 9.0                    | SPT                            |
| (Deloraine and Rouvière 2000)          | 1999                            | France, Rhone-Alps (Lyon and surrounding areas)  | 4988                 | Adults (general population) contacted by telephone survey                                                         | 8.5                    | questionnaire                  |
| (Gabrio et al.                         | 2004-2009                       | Germany, Baden-Württemberg                       | 2678                 | 10 year old (Grade 4) population                                                                                  | 14.6                   | sp IgE + SPT                   |

| Citation                                                                                   | Year(s) of data collection | Location of data collection: country, place name      | Study size | Population characteristics (including age, allergy/atopic patients or general population)                           | Sensitization rate (%) | Reactivity marker <sup>‡</sup> |
|--------------------------------------------------------------------------------------------|----------------------------|-------------------------------------------------------|------------|---------------------------------------------------------------------------------------------------------------------|------------------------|--------------------------------|
| 2010)                                                                                      |                            |                                                       |            | study                                                                                                               |                        |                                |
| (Gabrio et al. 2010)                                                                       | 2008-2009                  | Germany, Baden-Württemberg                            | 1134       | Adults (general population)                                                                                         | 11.0                   | sp IgE + SPT                   |
| (Heinzerling et al. 2009)                                                                  | 2006–2007                  | Germany, Berlin–Munich                                | not given* | Standardized allergy patients (GA <sup>2</sup> LEN)                                                                 | 14.4                   | SPT                            |
| (Eben et al. 2008)                                                                         | 2005-2007                  | Germany, Munich                                       | 1070       | Adult patients with history allergy disease                                                                         | 22.9                   | SPT + sp IgE                   |
| (Ruëff et al. 2012)                                                                        | 2006-2009                  | Germany, Munich and 3 smaller towns, Southern Bavaria | 977        | Patients with documented or suspected atopic disease or food allergy. Median age 43y                                | 19.5                   | SPT / sp IgE                   |
| (McIntyre et al. 2010; McIntyre et al. 2012; McIntyre et al. 2011a; McIntyre et al. 2011b) | 2008-2010                  | Germany, Munich, Bavaria                              | 1022       | Patients from Bavarian University allergy unit (with suspected sensitization to seasonal aeroallergens)             | 28.3                   | SPT + sp IGE                   |
| (Boehme et al. 2013)                                                                       | 2007                       | Germany, south-west                                   | 1039       | 18-66 years old                                                                                                     | 10.8                   | SPT and sp IgE                 |
| (Heinzerling et al. 2009)                                                                  | 2006–2007                  | Greece, Athens                                        | not given* | Allergy patients (GA <sup>2</sup> LEN), crude rates given (not standardized)                                        | 11.7                   | SPT                            |
| (Nekam et al. 2011)                                                                        | pre 2011                   | Hungary, Kecskemet (south Hungary)                    | 50         | Adult patients with respiratory allergy for at least 2 pollen seasons including symptoms during the ragweed season. | 56.0                   | sp IgE                         |
| (Heinzerling et al. 2009)                                                                  | 2006–2007                  | Hungary, Budapest                                     | not given* | Standardized allergy patients (GA <sup>2</sup> LEN)                                                                 | 53.8                   | SPT                            |
| (Nekam et al. 2011)                                                                        | pre 2011                   | Hungary, Eger (north Hungary)                         | 50         | Adult patients with respiratory allergy for at least 2 pollen seasons                                               | 52.0                   | sp IgE                         |
| (Nekam et al. 2011)                                                                        | pre 2011                   | Hungary, Nyiregyhaz (south Hungary)                   | 50         | Adult patients with respiratory allergy for at least 2 pollen seasons including symptoms                            | 54.0                   | sp IgE                         |

| Citation                    | Year(s) of data collection | Location of data collection: country, place name | Study size              | Population characteristics (including age, allergy/atopic patients or general population)                                                                  | Sensitization rate (%) | Reactivity marker <sup>‡</sup> |
|-----------------------------|----------------------------|--------------------------------------------------|-------------------------|------------------------------------------------------------------------------------------------------------------------------------------------------------|------------------------|--------------------------------|
|                             |                            |                                                  |                         | during the ragweed season.                                                                                                                                 |                        |                                |
| (Dervaderics et al. 2002)   | pre 2002                   | Hungary, Paks                                    | 185                     | Hungarian nationals with self-reported allergy symptoms                                                                                                    | 20.0                   | SPT + sp IgE                   |
| (Kadocsa and Juhász 2002)   | 1998-1999                  | Hungary, Szeded (south Hungary)                  | 394                     | Seasonal allergic rhinitis patients                                                                                                                        | 84.8                   | SPT                            |
| (Asero et al. 2012)         | Not given                  | Italy, Clinica San Carlo, north of Milan         | 95                      | Study of immigrants in Northern Italy. But data for controls from patients seen at allergy center                                                          | 56.0                   | SPT                            |
| (Cecchi et al. 2010)        | 2006-2009                  | Italy, Florence                                  | 3086                    | Adult patients at allergy and clinical immunology unit                                                                                                     | 9.3                    | SPT                            |
| (Heinzerling et al. 2009)   | 2006–2007                  | Italy, Genoa and Palermo                         | not given*              | Standardized allergy patients (GA <sup>2</sup> LEN)                                                                                                        | 3.5                    | SPT                            |
| (Tosi et al. 2011)          | 1989-2008                  | Italy, Legnano                                   | 18594 (total 1993-2008) | Respiratory patients (>14 y) attending an allergy clinic for the first time. Annual rates of sensitization available, we restrict to the period 1993-2008. | 35.0                   | SPT                            |
| (Goracci and Goracci 1996)  | 1991-1995                  | Italy, Livorno (Leghorn), central Italy          | 325                     | Patients at department of allergology                                                                                                                      | 6.8                    | sp IgE                         |
| (Albertini et al. 2012)     | 1992-2008                  | Italy, Parma                                     | 19,468                  | Outpatients affected by respiratory disease                                                                                                                | 4.5                    | SPT                            |
| (Carosso and Gallezio 2000) | 1996-1997                  | Italy, Turin                                     | 5680                    | Subjects affected by rhino-conjunctivitis and/or bronchial asthma during spring and summer by respiratory symptoms                                         | 9.5                    | sp IgE                         |
| (Asero et al. 2012)         | Not given                  | Italy, Verona                                    | 75                      | Study of immigrants in Northern Italy. But data for controls from patients seen at allergy center                                                          | 0.0                    | SPT                            |
| (Milkovska et al. 2008)     | 1998-2000                  | Macedonia, Skopje                                | 722                     | Random subjects aged 18-78 (mean age 39.6y)                                                                                                                | 6.5                    | SPT                            |
| (Heinzerling                | 2006–2007                  | Netherlands, The; Amsterdam                      | not                     | Standardized allergy patients                                                                                                                              | 18.6                   | SPT                            |

| Citation                               | Year(s) of data collection | Location of data collection: country, place name             | Study size           | Population characteristics (including age, allergy/atopic patients or general population) | Sensitization rate (%) | Reactivity marker <sup>‡</sup> |
|----------------------------------------|----------------------------|--------------------------------------------------------------|----------------------|-------------------------------------------------------------------------------------------|------------------------|--------------------------------|
| et al. 2009)                           |                            |                                                              | given*               | (GA <sup>2</sup> LEN)                                                                     |                        |                                |
| (Beijer and Versteeg 2010)             | 2007                       | Netherlands, The; authors are based in Leiden and Leiderdorp | 307                  | Participants tested positive for specific IgE for common inhalant allergies.              | 9.4                    | sp IgE                         |
| (De Weger et al. 2009)                 | 2004-2006                  | Netherlands, The; Leiden?                                    | 250                  | Patients with suspected allergic disease. Allergic to inhaled aeroallergens               | 6.7                    | sp IgE                         |
| (Heinzerling et al. 2009)              | 2006-2007                  | Poland, Lodz                                                 | not given*           | Standardized allergy patients (GA <sup>2</sup> LEN)                                       | 10.8                   | SPT                            |
| (Heinzerling et al. 2009) <sup>a</sup> | 2006-2007                  | Portugal, Coimbra                                            | not given*           | Standardized allergy patients (GA <sup>2</sup> LEN)                                       | 12.4                   | SPT                            |
| (Popescu and Tudose 2011)              | 2009-2010                  | Romania, Bucharest                                           | 447                  | Patients with allergic rhinitis (5-62y)                                                   | 11.2                   | SPT / sp IgE                   |
| (Ivanovic et al. 2013)                 | 2009                       | Romania, Timișoara city                                      | 1036                 | Patients who presented during 2009 to allergy specialist, 228 sensitized to ragweed       | 22.0                   | SPT                            |
| (Zvezdin et al. 2004)                  | 2000, 2002, 2003           | Serbia, Novi Sad                                             | 2148 (691, 756, 701) | People who had symptoms of allergic rhinitis and / or asthma                              | 30.0                   | SPT                            |
| (Ackermann-Lieblich et al. 2009)       | 2002                       | Switzerland, Aarau                                           | 949                  | Population cohort of adults (SAPALDIA cohort)                                             | 8.3                    | sp IgE                         |
| (Ackermann-Lieblich et al. 2009)       | 2002                       | Switzerland, Basel                                           | 778                  | Population cohort of adults (SAPALDIA cohort)                                             | 10.3                   | sp IgE                         |
| (Ackermann-Lieblich et al. 2009)       | 2002                       | Switzerland, Geneva                                          | 398                  | Population cohort of adults (SAPALDIA cohort)                                             | 8.3                    | sp IgE                         |
| (Ackermann-Lieblich et al. 2009)       | 2002                       | Switzerland, Lugano                                          | 741                  | Population cohort of adults (SAPALDIA cohort)                                             | 6.9                    | sp IgE                         |
| (Ackermann-Lieblich et al. 2009)       | 2002                       | Switzerland, Payerne                                         | 810                  | Population cohort of adults (SAPALDIA cohort)                                             | 5.8                    | sp IgE                         |



| Citation                         | Year(s) of data collection | Location of data collection: country, place name | Study size | Population characteristics (including age, allergy/atopic patients or general population) | Sensitization rate (%) | Reactivity marker <sup>‡</sup> |
|----------------------------------|----------------------------|--------------------------------------------------|------------|-------------------------------------------------------------------------------------------|------------------------|--------------------------------|
| al. 2009)                        |                            |                                                  |            |                                                                                           |                        |                                |
| (Ackermann-Liebrich et al. 2009) | 2002                       | Switzerland, Wald                                | 1095       | Population cohort of adults (SAPALDIA cohort)                                             | 7.8                    | sp IgE                         |
| (Heinzerling et al. 2009)        | 2006–2007                  | Switzerland, Zurich                              | not given* | Standardized allergy patients (GA <sup>2</sup> LEN)                                       | 18.6                   | SPT                            |
| (Heinzerling et al. 2009)        | 2006–2007                  | United Kingdom, London                           | not given* | Allergy patients (GA <sup>2</sup> LEN), crude rates given (not standardized)              | 7.9                    | SPT                            |

\* SPT: Skin prick tests; sp IgE: Ragweed specific Immunoglobulin E

\* Although no specific population for each location is provided, these data are all from the GA<sup>2</sup>LEN study which collectively included over 3000 people. Hence we assumed that each individual location would have had a large enough population to be included in our study

<sup>‡</sup> Excluded from the statistical analysis due to a very low baseline pollen level (< 10 grains m<sup>3</sup>·y<sup>-1</sup>)

## References

- Ackermann-Lieblich U, Schindler C, Frei P, Probst-Hensch NM, Imboden M, Gemperli A, et al. 2009. Sensitisation to *Ambrosia* in Switzerland: A public health threat in waiting. *Swiss Med Wkly* 139:70-75.
- Albertini R, Ugolotti M, Peveri S, Valenti MT, Usberti I, Ridolo E, et al. 2012. Evolution of ragweed pollen concentrations, sensitization and related allergic clinical symptoms in Parma (northern Italy). *Aerobiologia* 28:347-354.
- Asero R, Conte M, Senna GE. 2012. Features of sensitization to airborne allergens among extra-european immigrants living in 2 distinct areas of Northern Italy. *Eur Ann Allergy Clinical Immunol* 44:107-112.
- ATOPICA. 2014. Atopica Final Report. Brussels:European Union.
- Beijer C, Versteeg M. 2010. Sensitisation to *Ambrosia* in The Netherlands: a public health threat or just cross-reaction? *Allergy* 65:94-94.
- Boehme MWJ, Kompauer I, Weidner U, Piechotowski I, Gabrio T, Behrendt H. 2013. Respiratory symptoms and sensitization to airborne pollen of ragweed and mugwort of adults in Southwest Germany. *Dtsch Med Wochenschr* 138:1651-1658.
- Burbach GJ, Heinzerling LM, Edenharter G, Bachert C, Bindslev-Jensen C, Bonini S, et al. 2009. GA<sup>2</sup>LEN skin test study II: Clinical relevance of inhalant allergen sensitizations in Europe. *Allergy* 64:1507-1515.
- Carosso A, Gallesio MT. 2000. Allergy to ragweed: Clinical relevance in Turin. *Aerobiologia* 16:155-158.
- Cecchi L, D'Amato G, Ayres JG, Galan C, Forastiere F, Forsberg B, et al. 2010. Projections of the effects of climate change on allergic asthma: The contribution of aerobiology. *Allergy* 65:1073-1081.
- Cvitanovic S, Znaor L, Kanceljak-Macan B. 2007. Allergic rhinitis and asthma in southern Croatia:

impact of sensitization to *Ambrosia elatior*. . Croatian Medical Journal 48:68-75.

De Weger LA, Van Der Linden AC, Terreehorst I, Van Der Slikke WJ, Van Vliet AJH, Hiemstra PS. 2009. *Ambrosia* in the Netherlands: Allergic sensitivities and spreading of plants and clumps. Ned Tijdschr Geneesk 153:798-803.

Deloraine A, Rouvière F. 2000. Place de l'allergie due à l'ambrosie parmi les pollinoses en Rhône-Alpes. Grenoble, France:Centre Rhône-Alpes d'épidémiologie et de prévention sanitaire (CAREPS).

Dervaderics M, Fust G, Otos M, Barok J, Pataky G. 2002. Differences in the sensitisation to ragweed pollen and occurrence of late summer allergic symptoms between native and immigrant workers of the Nuclear Power Plant of Hungary. Immunol Invest 31:29-40.

Eben R, Gabrio T, Huss-Marp J, Darsow U, Jessberger B, Link B, et al. 2008. Sensitisation to *Ambrosia artemisiifolia* (ragweed): a common finding in Southern Germany with potential clinical relevance. Allergy 63:466-467.

Gabrio T, Alberternst B, Böhme M, Kaminski U, Nawrath S, Behrendt H. 2010. Sensitization to allergens of *Ambrosia artemisiifolia* and other allergens on 10 years old children and adults in Baden-Württemberg. Umweltmed Forsch Prax 15:15-22.

Goracci E, Goracci G. 1996. Ragweed (*Ambrosia*) pollen presence in Livorno, Central Italy: Aerobiological and sensitization data. Aerobiologia 12:139-170.

Heinzerling LM, Burbach GJ, Edenharter G, Bachert C, Bindslev-Jensen C, Bonini S, et al. 2009. GA<sup>2</sup>LEN skin test study I: GALEN harmonization of skin prick testing: Novel sensitization patterns for inhalant allergens in Europe. Allergy 64:1498-1506.

Hemmer W, Schauer U, Trinca A, Neumann C, Jarisch R. 2011. Ragweed Pollen Allergy in Austria: a Retrospective Analysis of Sensitization Rates from 1997 to 2007. J Allergy Clin Immunol 127:AB170-AB170.

Ianovici N, Panaitescu CB, Brudiu I. 2013. Analysis of airborne allergenic pollen spectrum for 2009 in Timișoara, Romania. Aerobiologia 29:95-111.

Jäger S. 2000. Ragweed (*Ambrosia*) sensitisation rates correlate with the amount of inhaled airborne pollen. A 14-year study in Vienna, Austria. *Aerobiologia* 16:149-153.

Kadocsa E, Juhász M. 2002. Study of airborne pollen composition and allergen spectrum of hay fever patients in South Hungary (1990-1999). *Aerobiologia* 18:203-209.

McIntyre M, Jaeger T, Wopfner N, Ferreira F, Ollert M, Ring J, et al. 2010. Ragweed testing in Bavaria: positive challenge test result in every fourth patient with *Ambrosia* sensitisation. *Allergy* 65:200-201.

McIntyre M, Jaeger T, Huss-Marp J, Hauser M, Ferreira F, Ollert M, et al. 2012. 30 Ragweed Allergy – What Role Does It Play in Bavaria? *The World Allergy Organization Journal* 5:S27-S28.

McIntyre MS, Jaeger T, Huss-Marp J, Ollert M, Schmidt-Weber C, Ring J, et al. 2011a. Ragweed sensitization in Bavaria: Results of a three-year Study on clinical Relevance. *Journal Der Deutschen Dermatologischen Gesellschaft* 9:132-132.

McIntyre MS, Jaeger T, Huss-Marp J, Wopfner N, Ferreira F, Ollert M, et al. 2011b. Sensitisation and allergy to ragweed in Bavaria - a health threat? *Allergy* 66:250-250.

Mehulić M, Mehulić K, Vuljanko IM, Kukulj S, Grle SP, Vukić AD, et al. 2011. Changing pattern of sensitization in Croatia to aeroallergens in adult population referring to allergy clinic during a period of 15 years. *Coll Antropol* 35:529-536.

Milkovska S, Karadzinska-Bislimovska J, Cvetanov V, Janackov B, Minov J, Risteska-Kuc S, et al. 2008. *Ambrosia* and *Artemisia* in r. Macedonia: aeropallinological and allergenic significance. *Allergy* 63:398-398.

Nekam K, Paldy A, Apatini D, Magyar D, DuBuske LM. 2011. Sensitization Patterns to Allergens in Ragweed Allergic Patients from Regions of Hungary Having Different Levels of Ragweed Allergen Exposure. *J Allergy Clin Immunol* 127:AB255-AB255.

Nikolov G, Hristova-Savova M, Nedyalkov M, Petrunov B. 2013. The Role of *Ambrosia* Allergen in respiratory diseases in Bulgaria. *Allergy, Asthma & Immunophysiology: From Basic Science to Clinical Management*:35-38.

Peternel R, Milanović SM, Srnec L. 2008. Airborne ragweed (*Ambrosia artemisiifolia* L.) pollen content in the city of Zagreb and implications on pollen allergy. *Ann Agric Environ Med* 15:125-130.

Popescu F, Tudose AM. 2011. Ambrosia pollen sensitization in allergic rhinitis patients from the central part of the Romanian Plain *Romanian Journal of the Rhinology* 1:26-30.

Ruëff F, Przybilla B, Walker A, Gmeiner J, Kramer M, Sabanés-Bové D, et al. 2012. Sensitization to common ragweed in southern bavaria: Clinical and geographical risk factors in atopic patients. *Int Arch Allergy Immunol* 159:65-74.

Rybníček O, Novotná B, Rybníčková E, Rybníček K. 2000. Ragweed in the Czech Republic. *Aerobiologia* 16:287-290.

Tosi A, Wüthrich B, Bonini M, Pietragalla-Köhler B. 2011. Time lag between *Ambrosia* sensitisation and *Ambrosia* allergy: A 20-year study (1989-2008) in Legnano, northern Italy. *Swiss Med Wkly* 141.

Toth I, Peternel R, Gajnik D, Vojniković B. 2011. Micro-regional hypersensitivity variations to inhalant allergens in the city of Zagreb and Zagreb county. *Coll Antropol* 35:31-37.

Zvezdin B, Radišić P, Kojičić M, Obradović-Andelić S, Jarić D, Tepavac A, et al. 2004. Alergijske bolesti respiratornog trakta i polen ambrozije kao njihov uzročni faktor [AMBROSIA POLLEN - A CAUSATIVE AGENT OF ALLERGIC DISEASES OF THE RESPIRATORY TRACT]. *Pneumon* 4.

**Figure S2; Baseline and future population (percentage) sensitized to ragweed pollen at the NUTS2 level for RCP4.5 and RCP8.5 and a reference plant invasion scenario. Data are presented separately for the CHIMERE and WRF/RegCM model suites. Data source: GISCO - Eurostat (European Commission). Administrative boundaries: © EuroGeographics © UN-FAO © Turkstat.**

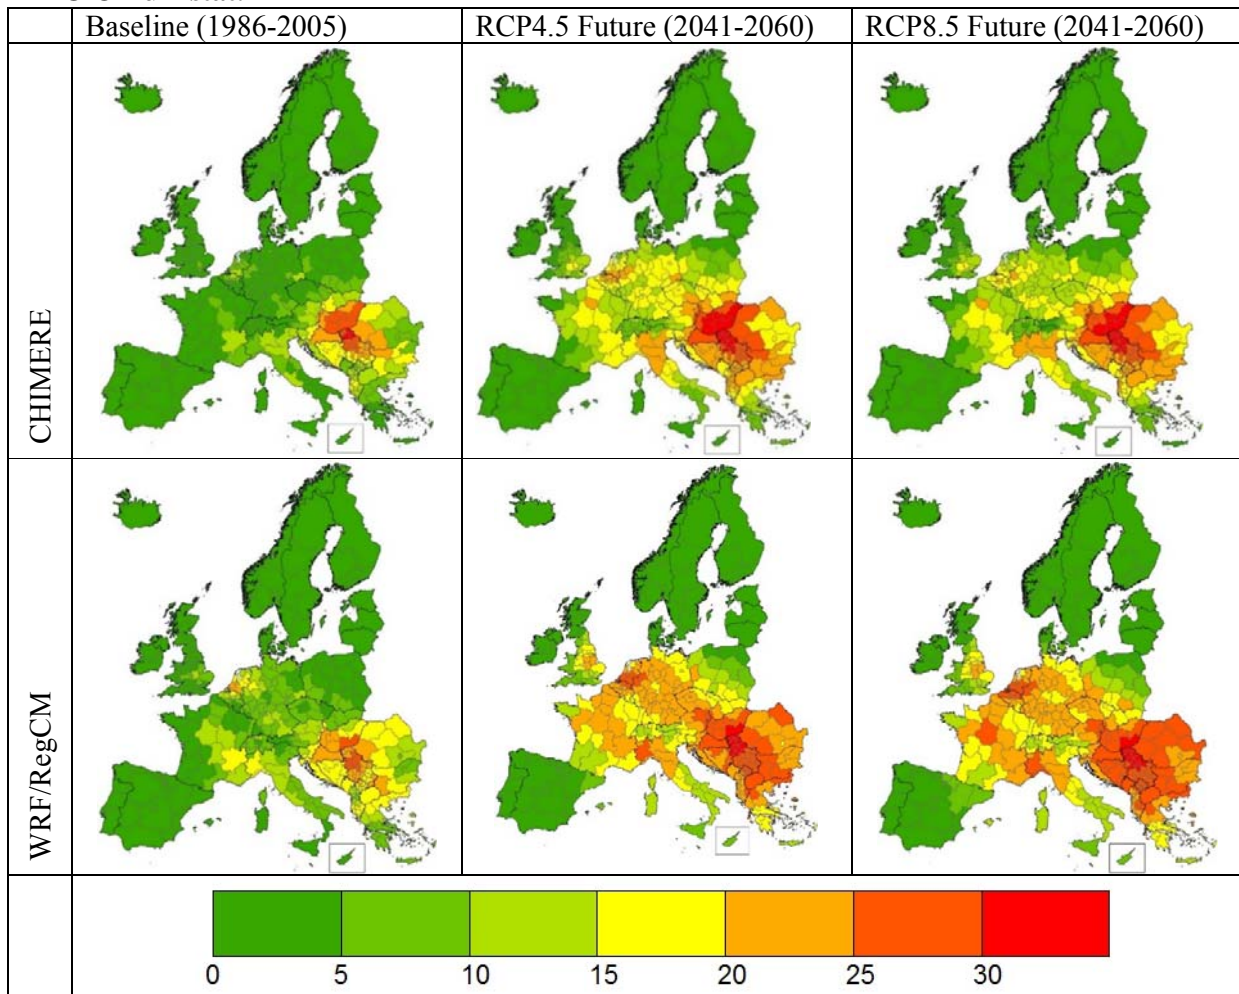

**Table S3: Population (in thousands) sensitized to ragweed for the current and future. Reference ragweed invasion scenario comparing RCP 4.5 and RCP 8.5, and 2 climate model suites (Chimere, WRF/RegCM) for 40 European countries; 95% confidence interval (CIs) shown in brackets.**

| Country              | Population sensitized in thousands |                            |                            |                           |                             |                             |  |
|----------------------|------------------------------------|----------------------------|----------------------------|---------------------------|-----------------------------|-----------------------------|--|
|                      | Baseline                           | Chimere                    |                            | WRF/RegCM                 |                             |                             |  |
|                      |                                    | 2041-2060                  |                            | Baseline                  | 2041-2060                   |                             |  |
|                      | RCP4.5                             | RCP8.5                     | RCP4.5                     | RCP8.5                    | RCP8.5                      |                             |  |
| Austria              | 868 (58,1883)                      | 1636 (342,3017)            | 1544 (307,2891)            | 912 (42,2020)             | 1863 (419,3328)             | 1814 (392,3262)             |  |
| Belgium              | 732 (0,1934)                       | 2143 (358,3939)            | 1997 (275,3738)            | 1115 (44,2525)            | 2585 (623,4547)             | 2693 (691,4696)             |  |
| Bulgaria             | 1135 (110,2254)                    | 1614 (330,2912)            | 1692 (368,3020)            | 1165 (146,2296)           | 1912 (502,3322)             | 2025 (573,3478)             |  |
| Croatia              | 804 (139,1513)                     | 1041 (243,1839)            | 1018 (229,1807)            | 943 (187,1704)            | 1156 (315,1997)             | 1157 (316,1999)             |  |
| Cyprus               | 0 (0,2)                            | 1 (0,59)                   | 0 (0,50)                   | 15 (0,91)                 | 71 (0,172)                  | 82 (0,187)                  |  |
| Czech Republic       | 409 (0,1484)                       | 1756 (152,3377)            | 1615 (90,3183)             | 565 (2,1739)              | 2130 (371,3891)             | 2145 (378,3912)             |  |
| Denmark              | 0 (0,0)                            | 29 (0,412)                 | 8 (0,306)                  | 0 (0,58)                  | 163 (0,729)                 | 229 (0,822)                 |  |
| Estonia              | 0 (0,0)                            | 0 (0,1)                    | 0 (0,8)                    | 0 (0,0)                   | 0 (0,2)                     | 0 (0,6)                     |  |
| Finland              | 0 (0,0)                            | 0 (0,0)                    | 0 (0,0)                    | 0 (0,0)                   | 0 (0,0)                     | 0 (0,0)                     |  |
| France               | 2256 (41,6228)                     | 8849 (981,17862)           | 8210 (866,16840)           | 4210 (145,11127)          | 12582 (2306,23050)          | 13233 (2650,23945)          |  |
| Germany              | 2282 (0,8849)                      | 13337 (1267,25830)         | 11814 (726,23735)          | 7095 (114,17219)          | 18041 (3847,32297)          | 18033 (3831,32287)          |  |
| Greece               | 487 (5,1687)                       | 1341 (69,2878)             | 1179 (50,2656)             | 1176 (50,2652)            | 2188 (336,4043)             | 2229 (360,4099)             |  |
| Hungary              | 2668 (750,4586)                    | 3069 (1000,5137)           | 3057 (993,5121)            | 1910 (328,3544)           | 2729 (788,4670)             | 2744 (798,4690)             |  |
| Ireland              | 0 (0,0)                            | 0 (0,0)                    | 0 (0,0)                    | 0 (0,0)                   | 8 (0,263)                   | 1 (0,144)                   |  |
| Italy                | 4097 (113,10583)                   | 9563 (1409,18679)          | 9174 (1449,18144)          | 5474 (300,13055)          | 10656 (1545,20182)          | 10923 (1649,20548)          |  |
| Latvia               | 0 (0,0)                            | 0 (0,82)                   | 0 (0,114)                  | 0 (0,0)                   | 0 (0,64)                    | 0 (0,106)                   |  |
| Lithuania            | 0 (0,20)                           | 11 (0,273)                 | 29 (0,320)                 | 0 (0,0)                   | 2 (0,225)                   | 4 (0,267)                   |  |
| Luxembourg           | 0 (0,4)                            | 57 (0,125)                 | 48 (0,112)                 | 31 (0,88)                 | 98 (15,181)                 | 102 (18,187)                |  |
| Malta                | 0 (0,13)                           | 18 (0,63)                  | 10 (0,52)                  | 0 (0,37)                  | 38 (0,90)                   | 37 (0,88)                   |  |
| Netherlands          | 1300 (0,3224)                      | 2863 (346,5455)            | 2494 (197,4947)            | 3148 (487,5847)           | 4115 (1054,7177)            | 4256 (1142,7371)            |  |
| Poland               | 1251 (0,4590)                      | 4175 (221,9237)            | 4087 (217,9115)            | 994 (4,4182)              | 4619 (343,9848)             | 4889 (443,10218)            |  |
| Portugal             | 0 (0,0)                            | 0 (0,0)                    | 0 (0,0)                    | 0 (0,0)                   | 0 (0,0)                     | 0 (0,0)                     |  |
| Romania              | 3045 (392,6154)                    | 4473 (864,8117)            | 4802 (1044,8570)           | 3148 (332,6296)           | 5072 (1203,8941)            | 5551 (1502,9600)            |  |
| Slovakia             | 790 (65,1583)                      | 1221 (266,2175)            | 1210 (259,2160)            | 462 (16,1133)             | 1100 (191,2009)             | 1177 (239,2116)             |  |
| Slovenia             | 281 (17,574)                       | 397 (61,734)               | 393 (59,728)               | 327 (30,638)              | 451 (95,808)                | 449 (93,805)                |  |
| Spain                | 0 (0,2)                            | 35 (0,843)                 | 10 (0,632)                 | 42 (0,745)                | 858 (0,3278)                | 1372 (0,4358)               |  |
| Sweden               | 0 (0,0)                            | 1 (0,121)                  | 0 (0,94)                   | 0 (0,3)                   | 25 (0,213)                  | 45 (0,283)                  |  |
| United Kingdom       | 1008 (0,3774)                      | 5113 (244,11626)           | 4568 (223,10689)           | 1384 (33,6270)            | 7232 (488,15281)            | 7378 (530,15402)            |  |
| <b>Sum EU28</b>      | <b>23413 (1691,60938)</b>          | <b>62743 (8153,124793)</b> | <b>58959 (7351,119034)</b> | <b>34116 (2263,83266)</b> | <b>79693 (14442,150607)</b> | <b>82569 (15603,154876)</b> |  |
| Albania              | 400 (9,812)                        | 580 (101,1059)             | 559 (88,1031)              | 388 (10,795)              | 673 (159,1186)              | 703 (178,1228)              |  |
| Andorra              | 0 (0,0)                            | 0 (0,5)                    | 0 (0,4)                    | 0 (0,4)                   | 5 (0,14)                    | 7 (0,17)                    |  |
| Bosnia & Herzegovina | 682 (88,1289)                      | 869 (193,1545)             | 848 (179,1516)             | 724 (104,1346)            | 958 (248,1668)              | 977 (260,1694)              |  |
| Iceland              | 0 (0,0)                            | 0 (0,0)                    | 0 (0,0)                    | 0 (0,0)                   | 0 (0,0)                     | 0 (0,0)                     |  |
| Kosovo               | 196 (1,429)                        | 391 (85,697)               | 382 (79,684)               | 323 (43,603)              | 468 (133,802)               | 471 (135,808)               |  |
| Liechtenstein        | 0 (0,0)                            | 1 (0,4)                    | 1 (0,4)                    | 1 (0,5)                   | 4 (0,9)                     | 4 (0,9)                     |  |
| FYR Macedonia        | 291 (5,588)                        | 449 (92,805)               | 427 (79,776)               | 308 (19,612)              | 524 (139,908)               | 525 (140,910)               |  |
| Montenegro           | 56 (0,133)                         | 101 (7,195)                | 103 (8,199)                | 101 (9,196)               | 146 (35,258)                | 155 (40,270)                |  |
| Norway               | 0 (0,0)                            | 0 (0,0)                    | 0 (0,0)                    | 0 (0,0)                   | 0 (0,13)                    | 0 (0,17)                    |  |
| San Marino           | 2 (0,6)                            | 5 (0,9)                    | 4 (0,9)                    | 2 (0,6)                   | 4 (0,9)                     | 5 (0,9)                     |  |
| Serbia               | 1731 (427,3045)                    | 2042 (611,3472)            | 2035 (607,3463)            | 1685 (388,2981)           | 2105 (651,3559)             | 2121 (661,3581)             |  |
| Switzerland          | 135 (0,654)                        | 650 (3,1607)               | 598 (4,1535)               | 618 (1,1563)              | 1257 (117,2442)             | 1263 (116,2449)             |  |
| <b>Sum non-EU28</b>  | <b>3493 (530,6955)</b>             | <b>5087 (1092,9400)</b>    | <b>4957 (1044,9221)</b>    | <b>4151 (575,8111)</b>    | <b>6144 (1482,10869)</b>    | <b>6231 (1530,10992)</b>    |  |
| <b>Sum Europe</b>    | <b>26905 (2222,67893)</b>          | <b>67829 (9245,134193)</b> | <b>63916 (8395,128255)</b> | <b>38266 (2838,91377)</b> | <b>85837 (15923,161476)</b> | <b>88799 (17133,165868)</b> |  |

**Table S4: Current and future populations clinically sensitized to ragweed pollen. Changes due to population change are also presented. Data are average of the CHIMERE and WRF/RegCM model suites for RCP4.5 and a reference plant invasion scenario.**

| Country              | Clinical sensitization value (%) <sup>a</sup> | Projected change in population, baseline to 2050 (%) | Population clinically sensitized in thousands [CHIMERE, WRF/RegCM] <sup>a</sup> |                      |              |                      |                                  |                      |
|----------------------|-----------------------------------------------|------------------------------------------------------|---------------------------------------------------------------------------------|----------------------|--------------|----------------------|----------------------------------|----------------------|
|                      |                                               |                                                      | Baseline                                                                        |                      | 2041-2060    |                      | 2041-2060 plus population change |                      |
| Austria              | 62.4                                          | 7.8                                                  | 555                                                                             | [542,569]            | 1092         | [1021,1163]          | 1176                             | [1101,1254]          |
| Belgium              | 100                                           | 9.4                                                  | 923                                                                             | [732,1115]           | 2364         | [2143,2585]          | 2585                             | [2344,2828]          |
| Bulgaria             | 75.9 <sup>b</sup>                             | -31.2                                                | 873                                                                             | [861,884]            | 1338         | [1225,1451]          | 920                              | [843,998]            |
| Croatia              | 75.9 <sup>b</sup>                             | -19.9                                                | 663                                                                             | [610,716]            | 834          | [790,877]            | 668                              | [633,702]            |
| Cyprus               | 75.9 <sup>b</sup>                             | 22.9                                                 | 6                                                                               | [0,11]               | 27           | [1,54]               | 33                               | [1,66]               |
| Czech Republic       | 75.9 <sup>b</sup>                             | 5.4                                                  | 370                                                                             | [310,429]            | 1475         | [1333,1617]          | 1554                             | [1405,1704]          |
| Denmark              | 64.6                                          | 12.5                                                 | 0                                                                               | [0,0]                | 62           | [19,105]             | 70                               | [21,118]             |
| Estonia              | 75.9 <sup>b</sup>                             | -14.2                                                | 0                                                                               | [0,0]                | 0            | [0,0]                | 0                                | [0,0]                |
| Finland              | 60.9                                          | 5.3                                                  | 0                                                                               | [0,0]                | 0            | [0,0]                | 0                                | [0,0]                |
| France               | 50.0                                          | 12.6                                                 | 1616                                                                            | [1128,2105]          | 5358         | [4425,6291]          | 6035                             | [4983,7084]          |
| Germany              | 83.6                                          | -15.9                                                | 3919                                                                            | [1908,5931]          | 13116        | [11150,15082]        | 11037                            | [9377,12684]         |
| Greece               | 43.6                                          | -7.0                                                 | 363                                                                             | [212,585]            | 769          | [513,954]            | 715                              | [477,887]            |
| Hungary              | 92.4                                          | -11.5                                                | 2115                                                                            | [2465,1765]          | 2678         | [2836,2522]          | 2370                             | [2510,2232]          |
| Ireland              | 75.9 <sup>b</sup>                             | 29.2                                                 | 0                                                                               | [0,0]                | 3            | [0,6]                | 4                                | [0,8]                |
| Italy                | 88.6                                          | -2.4                                                 | 4240                                                                            | [3630,4850]          | 8957         | [8473,9441]          | 8738                             | [8270,9214]          |
| Latvia               | 75.9 <sup>b</sup>                             | -22.5                                                | 0                                                                               | [0,0]                | 0            | [0,0]                | 0                                | [0,0]                |
| Lithuania            | 75.9 <sup>b</sup>                             | -19.8                                                | 0                                                                               | [0,0]                | 5            | [8,2]                | 4                                | [6,2]                |
| Luxembourg           | 75.9 <sup>b</sup>                             | 37.1                                                 | 12                                                                              | [0,24]               | 59           | [43,74]              | 81                               | [59,101]             |
| Malta                | 75.9 <sup>b</sup>                             | -2.1                                                 | 0                                                                               | [0,0]                | 21           | [14,29]              | 21                               | [14,28]              |
| Netherlands          | 89.8                                          | -0.6                                                 | 1997                                                                            | [1167,2827]          | 3133         | [2571,3695]          | 3115                             | [2556,3673]          |
| Poland               | 50.0                                          | -11.3                                                | 561                                                                             | [626,497]            | 2199         | [2088,2310]          | 1951                             | [1852,2049]          |
| Portugal             | 87.1                                          | -8.8                                                 | 0                                                                               | [0,0]                | 0            | [0,0]                | 0                                | [0,0]                |
| Romania              | 75.9 <sup>b</sup>                             | -19.6                                                | 2350                                                                            | [2311,2389]          | 3622         | [3395,3850]          | 2913                             | [2730,3095]          |
| Slovakia             | 75.9 <sup>b</sup>                             | -8.4                                                 | 475                                                                             | [600,351]            | 881          | [927,835]            | 807                              | [849,765]            |
| Slovenia             | 75.9 <sup>b</sup>                             | -3.4                                                 | 231                                                                             | [213,248]            | 322          | [301,342]            | 311                              | [291,330]            |
| Spain                | 75.9 <sup>b</sup>                             | 1.6                                                  | 16                                                                              | [0,32]               | 339          | [27,651]             | 345                              | [27,661]             |
| Sweden               | 75.9 <sup>b</sup>                             | 25.8                                                 | 0                                                                               | [0,0]                | 10           | [1,19]               | 12                               | [1,24]               |
| UK                   | 89.9                                          | 16.4                                                 | 1075                                                                            | [906,1244]           | 5549         | [4597,6502]          | 6462                             | [5351,7568]          |
| <b>Sum EU28</b>      |                                               |                                                      | <b>22361</b>                                                                    | <b>[18221,26572]</b> | <b>54212</b> | <b>[47901,60457]</b> | <b>51928</b>                     | <b>[47901,60457]</b> |
| Albania              | 75.9 <sup>b</sup>                             | -6.0                                                 | 299                                                                             | [304,294]            | 475          | [440,511]            | 447                              | [414,480]            |
| Andorra              | 75.9 <sup>b</sup>                             | 21.9                                                 | 0                                                                               | [0,0]                | 2            | [0,4]                | 2                                | [0,5]                |
| Bosnia & Herzegovina | 75.9 <sup>b</sup>                             | -13.4                                                | 534                                                                             | [518,550]            | 693          | [660,727]            | 601                              | [572,630]            |
| Iceland              | 75.9 <sup>b</sup>                             | 27.0                                                 | 0                                                                               | [0,0]                | 0            | [0,0]                | 0                                | [0,0]                |
| Kosovo               | 75.9 <sup>b</sup>                             | 29.5                                                 | 197                                                                             | [149,245]            | 326          | [297,355]            | 422                              | [385,460]            |
| Liechtenstein        | 75.9 <sup>b</sup>                             | 21.8                                                 | 0                                                                               | [0,1]                | 2            | [1,3]                | 2                                | [1,4]                |
| FYR Macedonia        | 75.9 <sup>b</sup>                             | -10.5                                                | 227                                                                             | [221,234]            | 369          | [341,398]            | 330                              | [305,356]            |
| Montenegro           | 75.9 <sup>b</sup>                             | -10.2                                                | 60                                                                              | [43,77]              | 94           | [77,111]             | 84                               | [69,100]             |
| Norway               | 75.9 <sup>b</sup>                             | 33.1                                                 | 0                                                                               | [0,0]                | 0            | [0,0]                | 0                                | [0,0]                |
| San Marino           | 75.9 <sup>b</sup>                             | 6.9                                                  | 2                                                                               | [2,2]                | 3            | [4,3]                | 4                                | [4,3]                |
| Serbia               | 75.9 <sup>b</sup>                             | -30.9                                                | 1296                                                                            | [1314,1279]          | 1574         | [1550,1598]          | 1087                             | [1071,1104]          |
| Switzerland          | 52.2                                          | 34.4                                                 | 196                                                                             | [70,323]             | 498          | [339,656]            | 669                              | [456,882]            |
| <b>Sum non-EU28</b>  |                                               |                                                      | <b>2811</b>                                                                     | <b>[2621,3005]</b>   | <b>4036</b>  | <b>[3709,4366]</b>   | <b>3649</b>                      | <b>[3709,4366]</b>   |
| <b>Sum Europe</b>    |                                               |                                                      | <b>25172</b>                                                                    | <b>[20842,29577]</b> | <b>58248</b> | <b>[51610,64823]</b> | <b>55577</b>                     | <b>[51610,64823]</b> |

<sup>a</sup> Country level estimates of the proportion of ragweed sensitized individuals who will experience clinical symptoms. Data from Burbach et al. (2009). Where country specific data is not available <sup>b</sup> the European average value of 75.9% is used
